# Supplementary material for: Rational design of galactopyranoside-substituted N-heterocyclic carbene palladium(ii) complexes. Stable and efficient catalyst for C–C coupling in aqueous media
Source: Royal Society of Chemistry journal article supplement (doi:10.1039/d3ra08031e), 2024-01-01

**Rational design of Galactopyranoside-substituted *N*-heterocyclic carbene Palladium(II)  
Complexes. Stable and Efficient catalyst for C-C coupling in aqueous medium**

Ariana W. Hobsteter, Marcos J. Lo Fiego<sup>†,\*</sup> and Gustavo F. Silbestri<sup>†,\*</sup>

INQUISUR, Departamento de Química, Universidad Nacional del Sur (UNS)-CONICET, Av. Alem 1253, B8000CPB  
Bahía Blanca, Argentina.

\* Corresponding authors: marcos.lofiego@uns.edu.ar (M. J. Lo Fiego); gsilbestri@uns.edu.ar (G. F. Silbestri)

† Member of CONICET

## Supplementary Material

### Table of Contents

|                                                                     |     |
|---------------------------------------------------------------------|-----|
| <sup>1</sup> H and <sup>13</sup> C NMR of <b>3a</b>                 | S2  |
| HSQC and FTIR-neat of <b>3a</b>                                     | S3  |
| <sup>1</sup> H and <sup>13</sup> C NMR of <b>3b</b>                 | S4  |
| HSQC and FTIR-neat of <b>3b</b>                                     | S5  |
| <sup>1</sup> H and <sup>13</sup> C NMR of <b>3c</b>                 | S6  |
| HSQC and FTIR-neat of <b>3c</b>                                     | S7  |
| <sup>1</sup> H and <sup>13</sup> C NMR of <b>4a</b>                 | S8  |
| HSQC of <b>4a</b>                                                   | S9  |
| <sup>1</sup> H and <sup>13</sup> C NMR of <i>o</i> -methoxybiphenyl | S10 |
| <sup>1</sup> H and <sup>13</sup> C NMR of <i>m</i> -methoxybiphenyl | S11 |
| <sup>1</sup> H and <sup>13</sup> C NMR of <i>p</i> -methoxybiphenyl | S12 |
| <sup>1</sup> H and <sup>13</sup> C NMR of <i>m</i> -methylbiphenyl  | S13 |
| <sup>1</sup> H and <sup>13</sup> C NMR of <i>p</i> -methylbiphenyl  | S14 |
| <sup>1</sup> H and <sup>13</sup> C NMR of <i>m</i> -chlorobiphenyl  | S15 |
| <sup>1</sup> H and <sup>13</sup> C NMR of <i>p</i> -cyanobiphenyl   | S16 |

**1-Butyl-3-(2,3,4,6-tetra-*O*-acetyl- $\beta$ -D-galactopyranosyl)imidazol-2-ylidene palladium(II) pyridine dichloro (3a,  $^1\text{H}$  NMR,  $\text{CDCl}_3$ )**

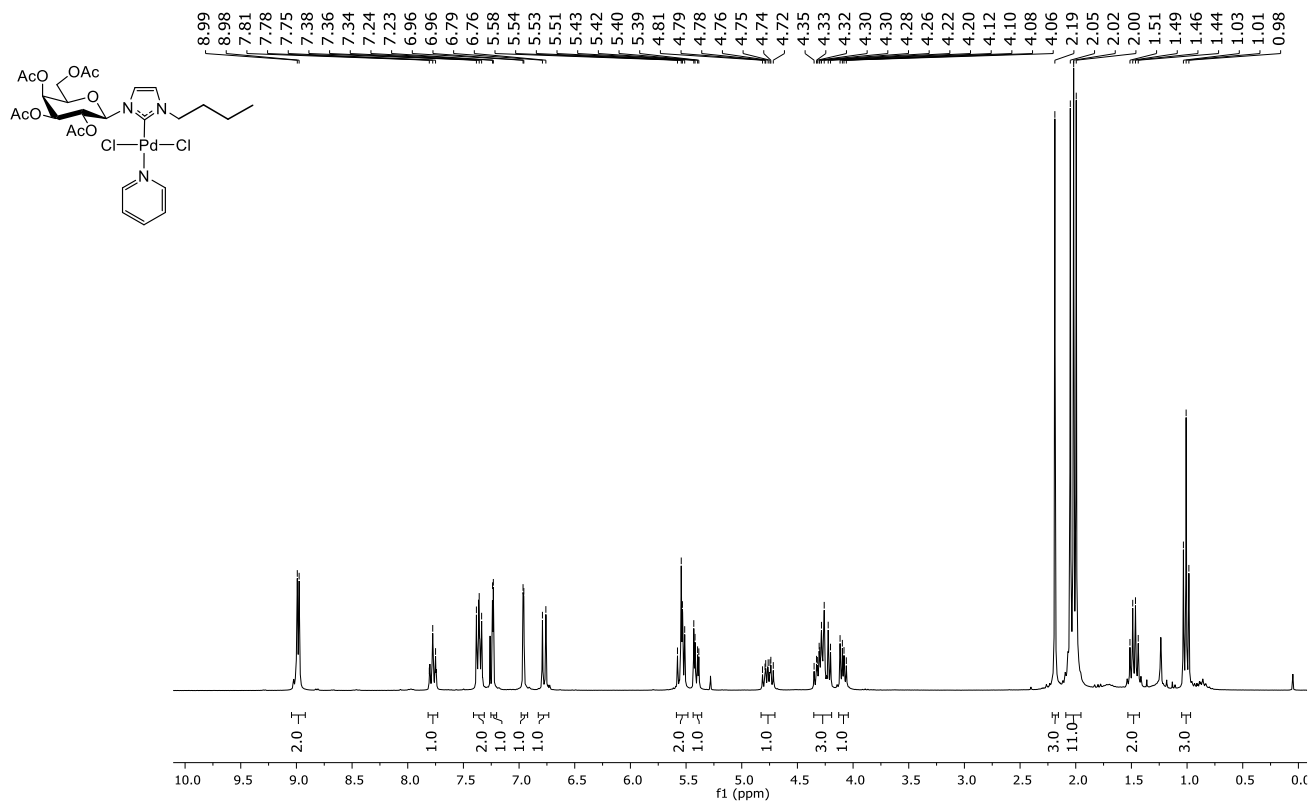

**1-Butyl-3-(2,3,4,6-tetra-*O*-acetyl- $\beta$ -D-galactopyranosyl)imidazol-2-ylidene palladium(II) pyridine dichloro (3a,  $^{13}\text{C}$  NMR,  $\text{CDCl}_3$ )**

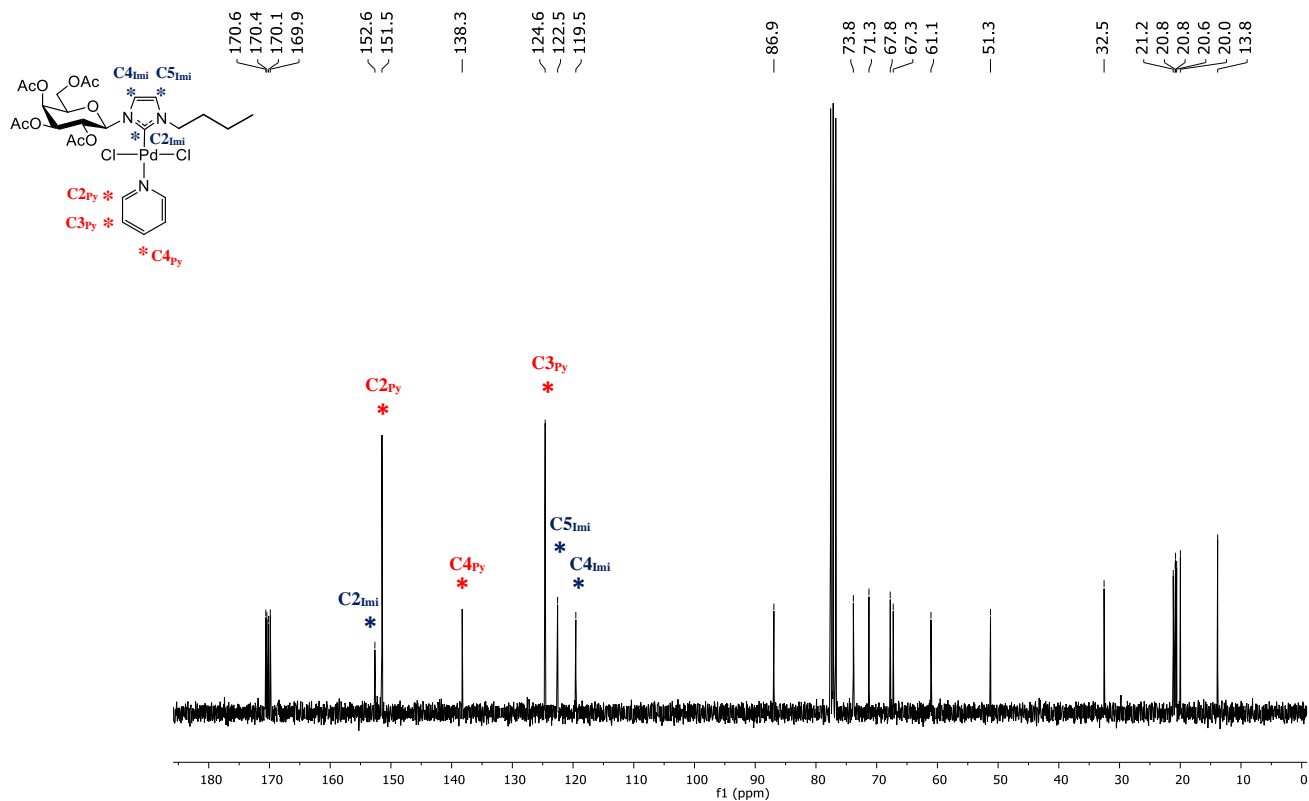

**1-Butyl-3-(2,3,4,6-tetra-*O*-acetyl- $\beta$ -D-galactopyranosyl)imidazol-2-ylidene palladium(II) pyridine dichloro (3a, HSQC, CDCl<sub>3</sub>)**

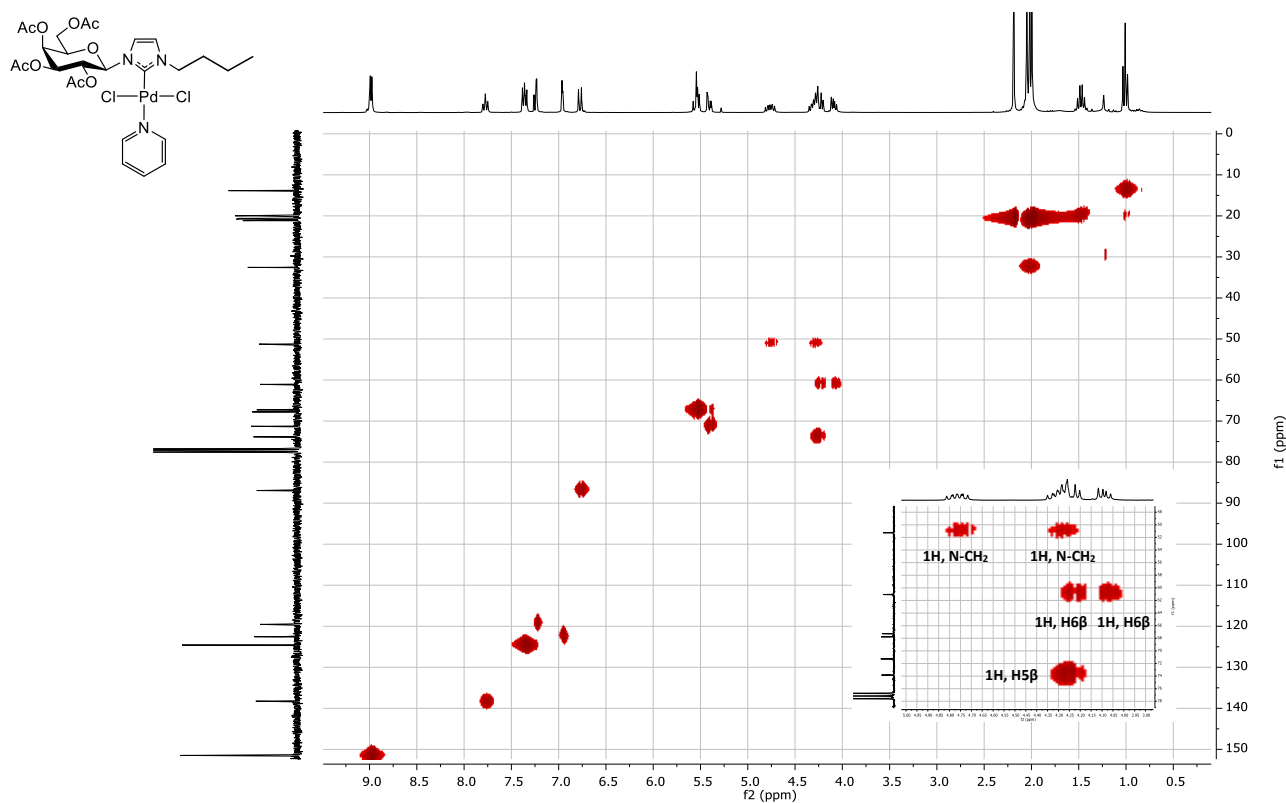

**1-Butyl-3-(2,3,4,6-tetra-*O*-acetyl- $\beta$ -D-galactopyranosyl)imidazol-2-ylidene palladium(II) pyridine dichloro (3a, FTIR-neat)**

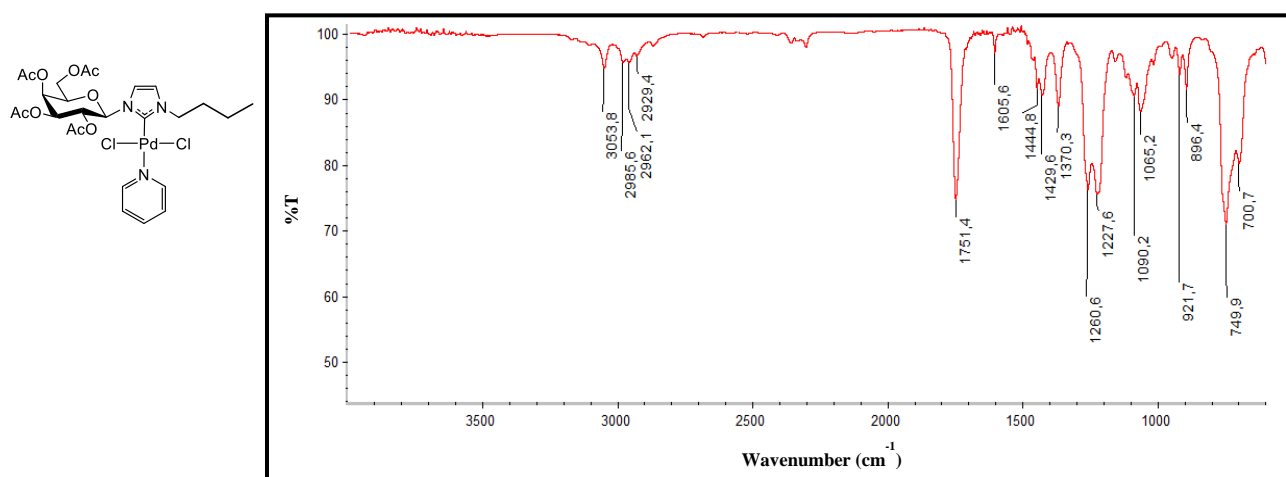

**1-Mesityl-3-(2,3,4,6-tetra-*O*-acetyl- $\beta$ -D-galactopyranosyl)imidazol-2-ylidene palladium(II) pyridine dichloro (3b,  $^1\text{H}$  NMR,  $\text{CDCl}_3$ )**

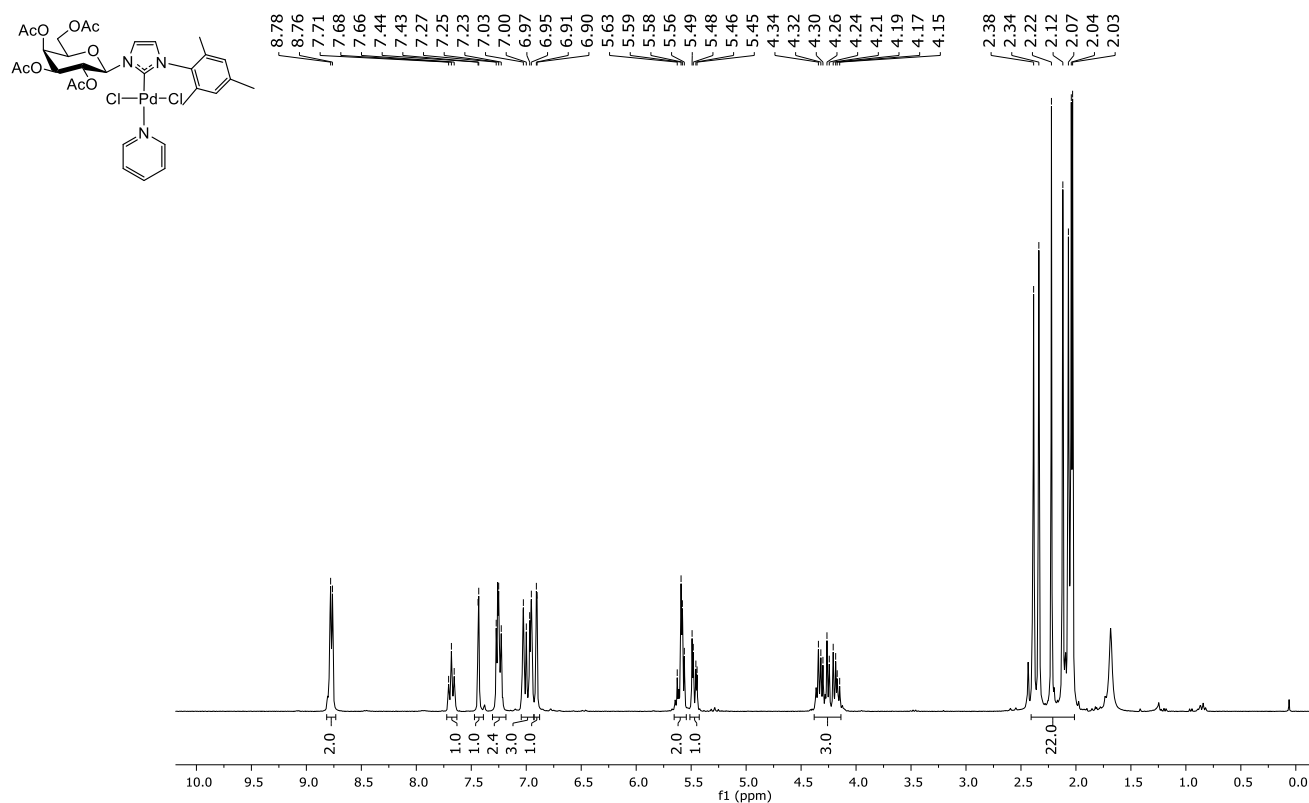

**1-Mesityl-3-(2,3,4,6-tetra-*O*-acetyl- $\beta$ -D-galactopyranosyl)imidazol-2-ylidene palladium(II) pyridine dichloro (3b,  $^{13}\text{C}$  NMR,  $\text{CDCl}_3$ )**

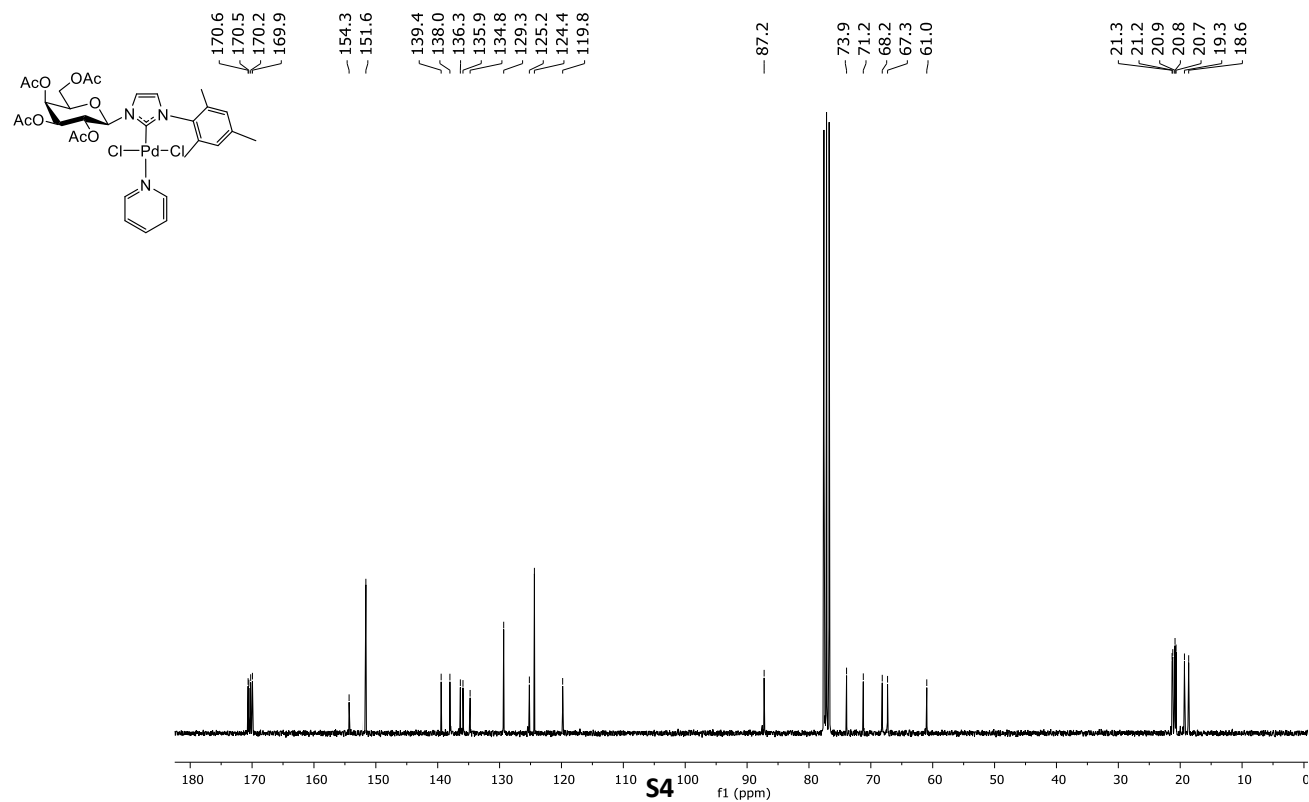

**1-Mesityl-3-(2,3,4,6-tetra-O-acetyl-β-D-galactopyranosyl)imidazol-2-ylidene palladium(II) pyridine dichloro (3b, HSQC, CDCl<sub>3</sub>)**

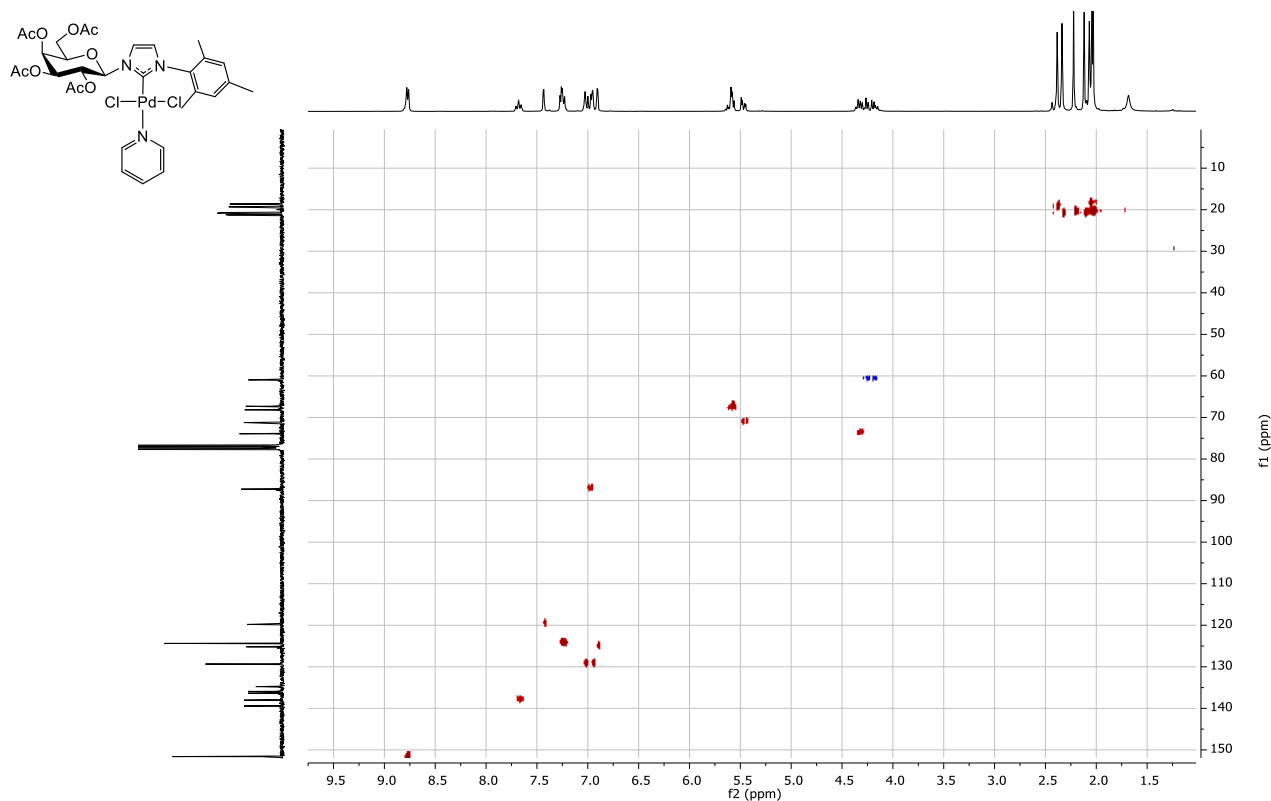

**1-Mesityl-3-(2,3,4,6-tetra-O-acetyl-β-D-galactopyranosyl)imidazol-2-ylidene palladium(II) pyridine dichloro (3b, FTIR-neat)**

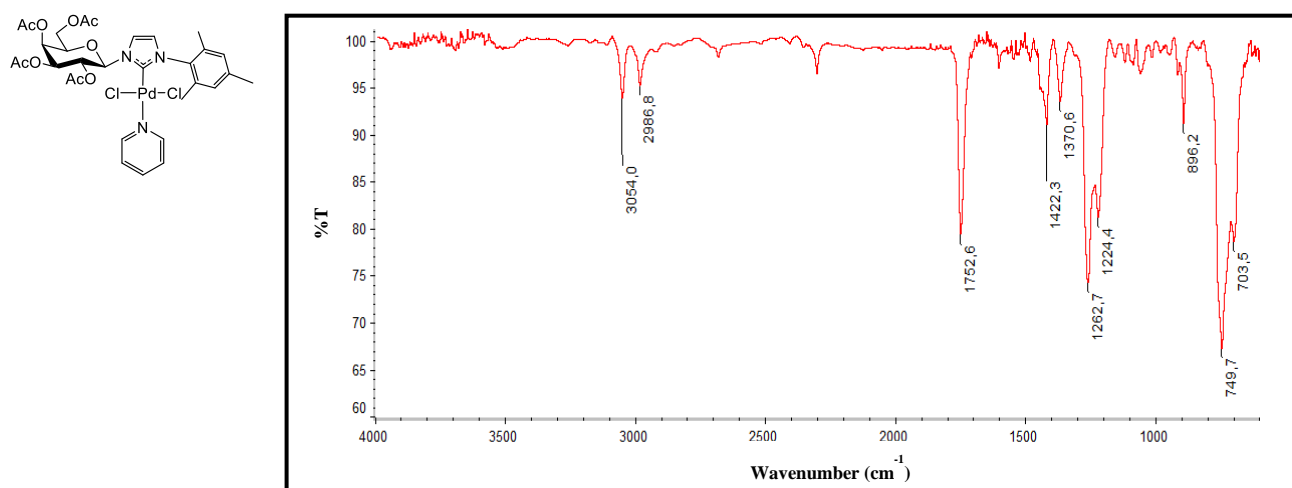

**1-(2,3,4,6-Tetra-*O*-acetyl- $\beta$ -D-galactopyranosyl)-3-(2,3,4,6-tetra-*O*-acetyl- $\beta$ -D-galactopyranosyl) imidazol-2-ylidene palladium(II) pyridine dichloro (**3c**,  $^1\text{H}$  NMR,  $\text{CDCl}_3$ )**

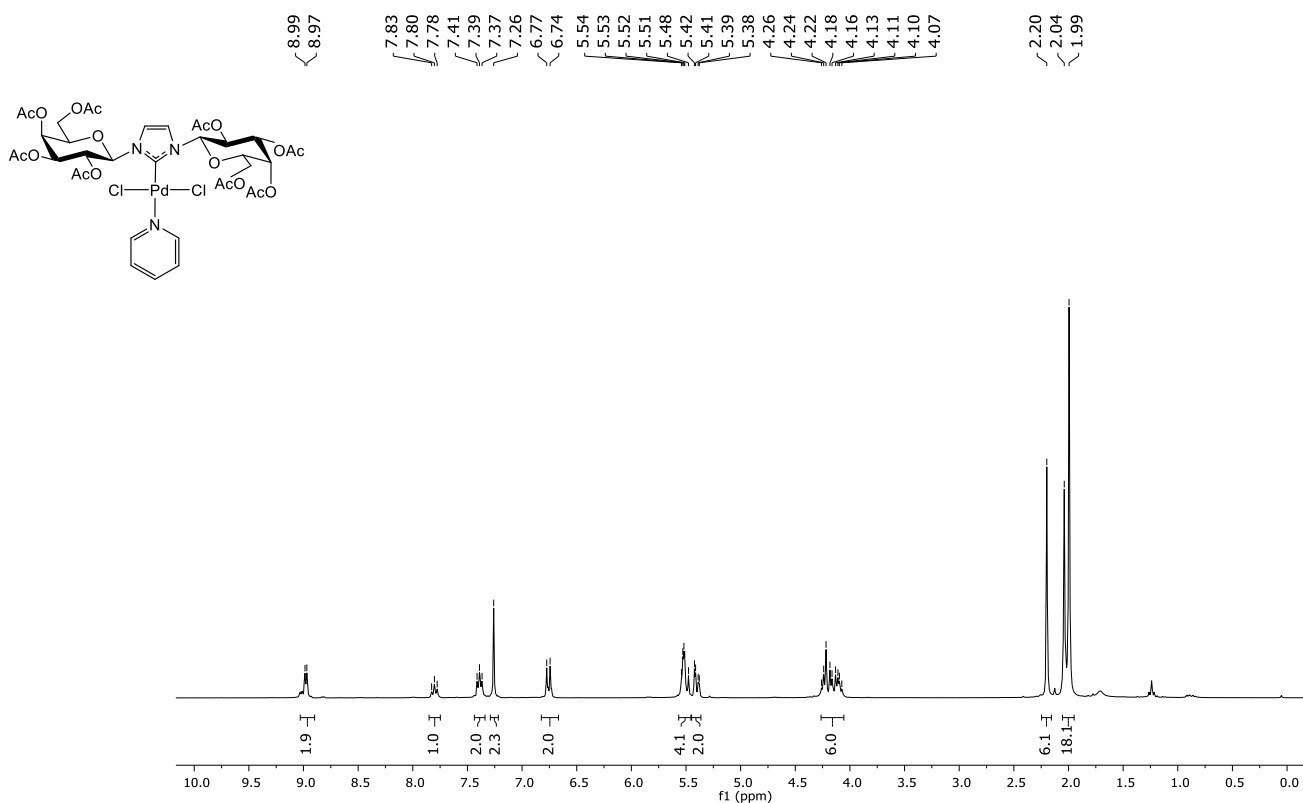

**1-(2,3,4,6-Tetra-*O*-acetyl- $\beta$ -D-galactopyranosyl)-3-(2,3,4,6-tetra-*O*-acetyl- $\beta$ -D-galactopyranosyl) imidazol-2-ylidene palladium(II) pyridine dichloro (**3c**,  $^{13}\text{C}$  NMR,  $\text{CDCl}_3$ )**

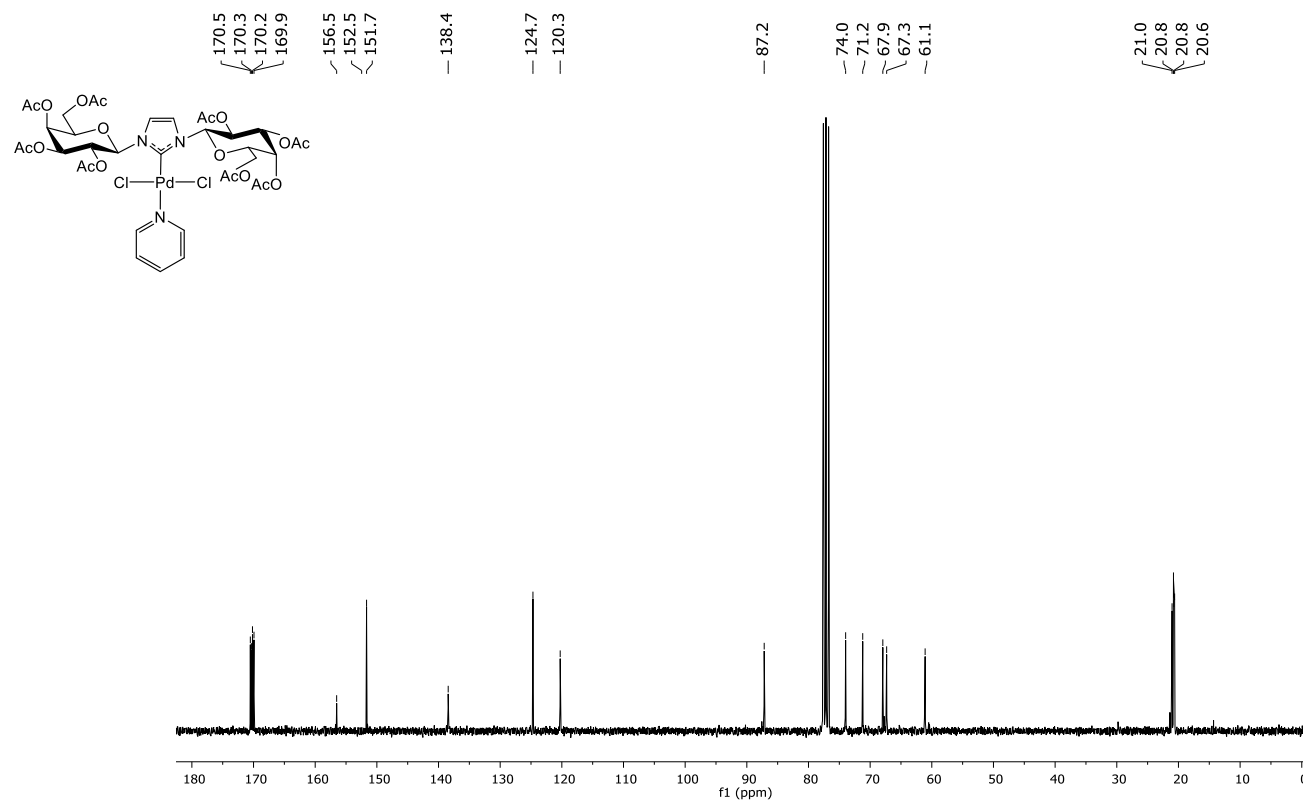

**1-(2,3,4,6-Tetra-*O*-acetyl- $\beta$ -D-galactopyranosyl)-3-(2,3,4,6-tetra-*O*-acetyl- $\beta$ -D-galactopyranosyl) imidazol-2-ylidene palladium(II) pyridine dichloro (3c, HSQC, CDCl<sub>3</sub>)**

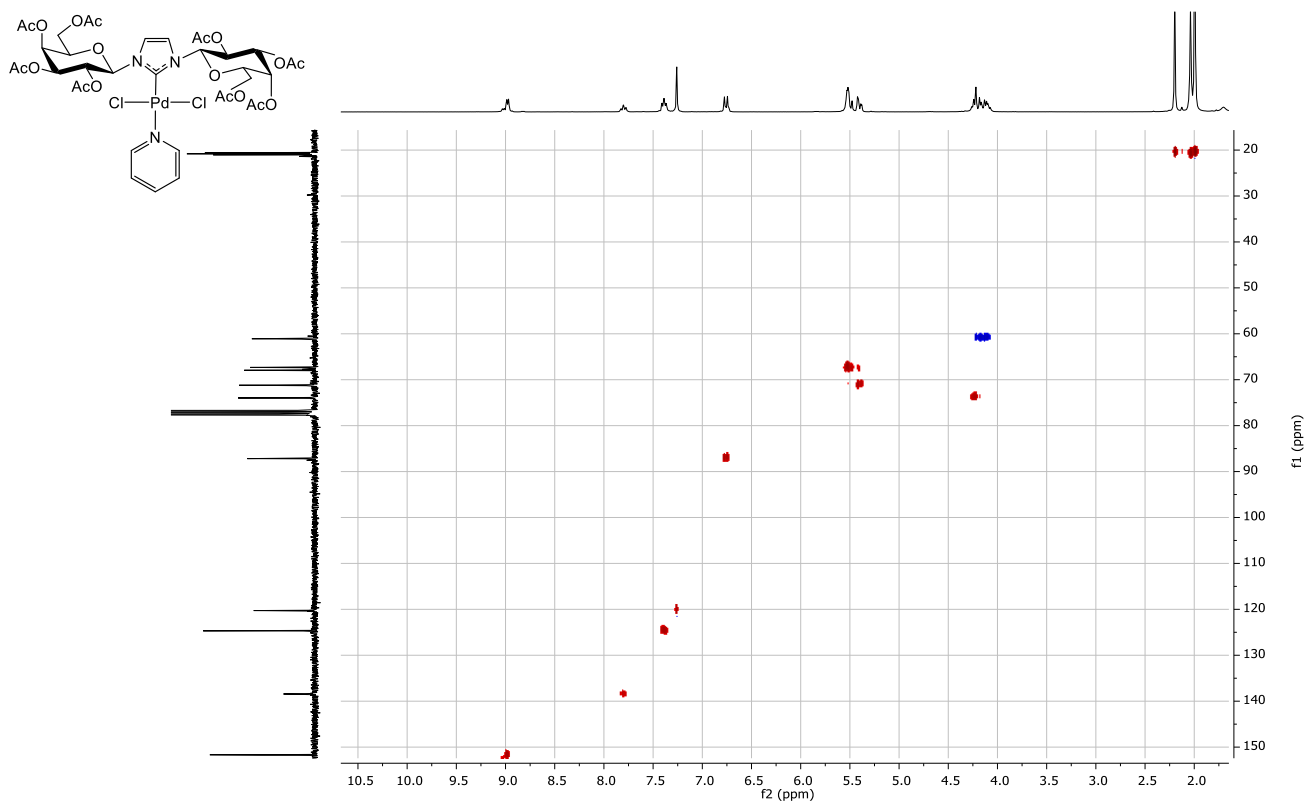

**1-(2,3,4,6-Tetra-*O*-acetyl- $\beta$ -D-galactopyranosyl)-3-(2,3,4,6-tetra-*O*-acetyl- $\beta$ -D-galactopyranosyl) imidazol-2-ylidene palladium(II) pyridine dichloro (3c, FTIR-neat)**

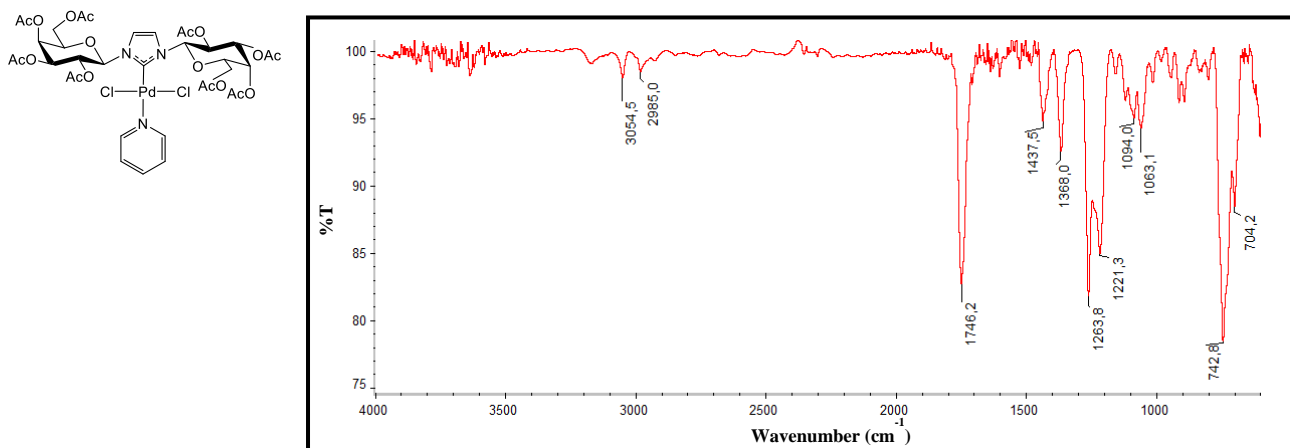

**1-Butyl-3-( $\beta$ -D-galactopyranosyl)imidazol-2-ylidene palladium(II) pyridine dichloro (4a,  $^1\text{H}$  NMR,  $\text{CDCl}_3$ )**

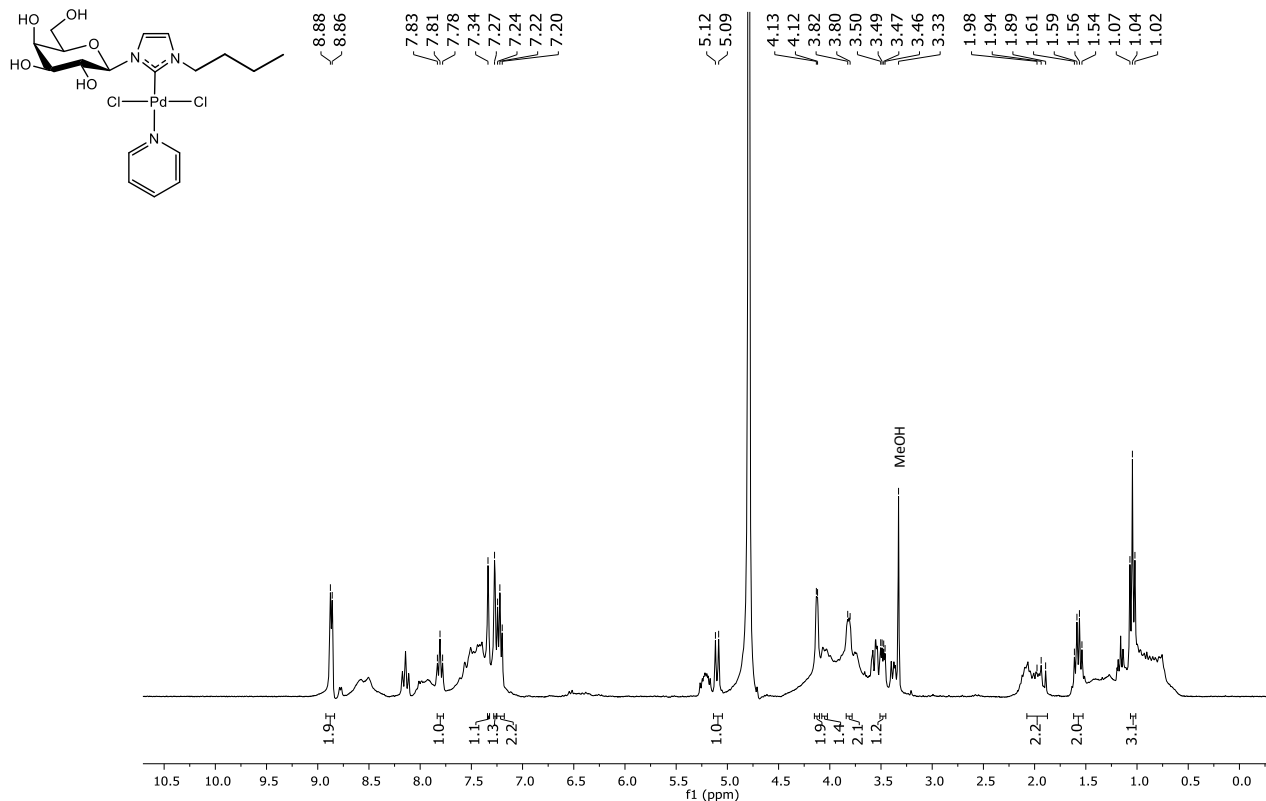

**1-Butyl-3-( $\beta$ -D-galactopyranosyl)imidazol-2-ylidene palladium(II) pyridine dichloro (4a,  $^{13}\text{C}$  NMR,  $\text{CDCl}_3$ )**

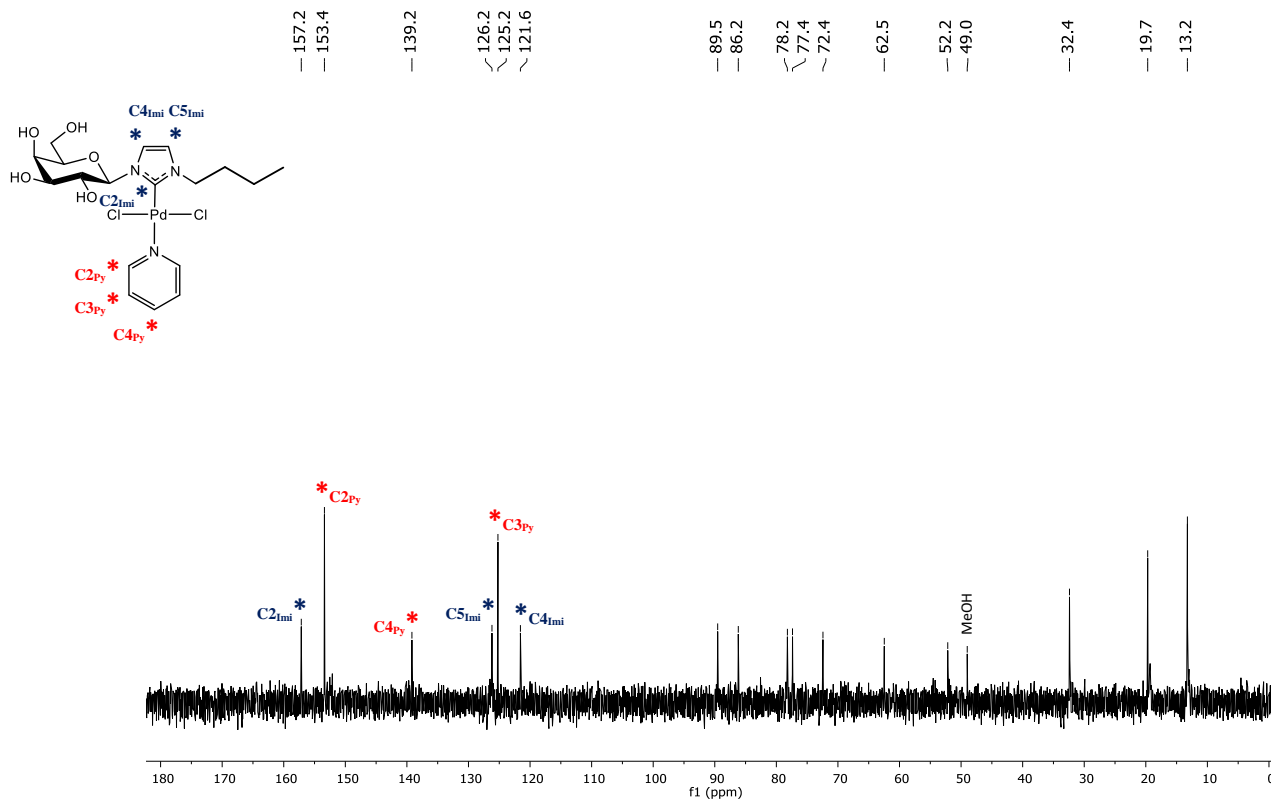



**1-Butyl-3-( $\beta$ -D-galactopyranosyl)imidazol-2-ylidene palladium(II) pyridine dichloro (4a, HSQC, CDCl<sub>3</sub>)**

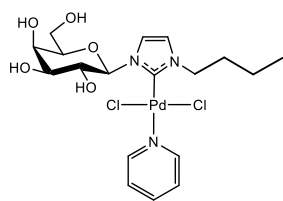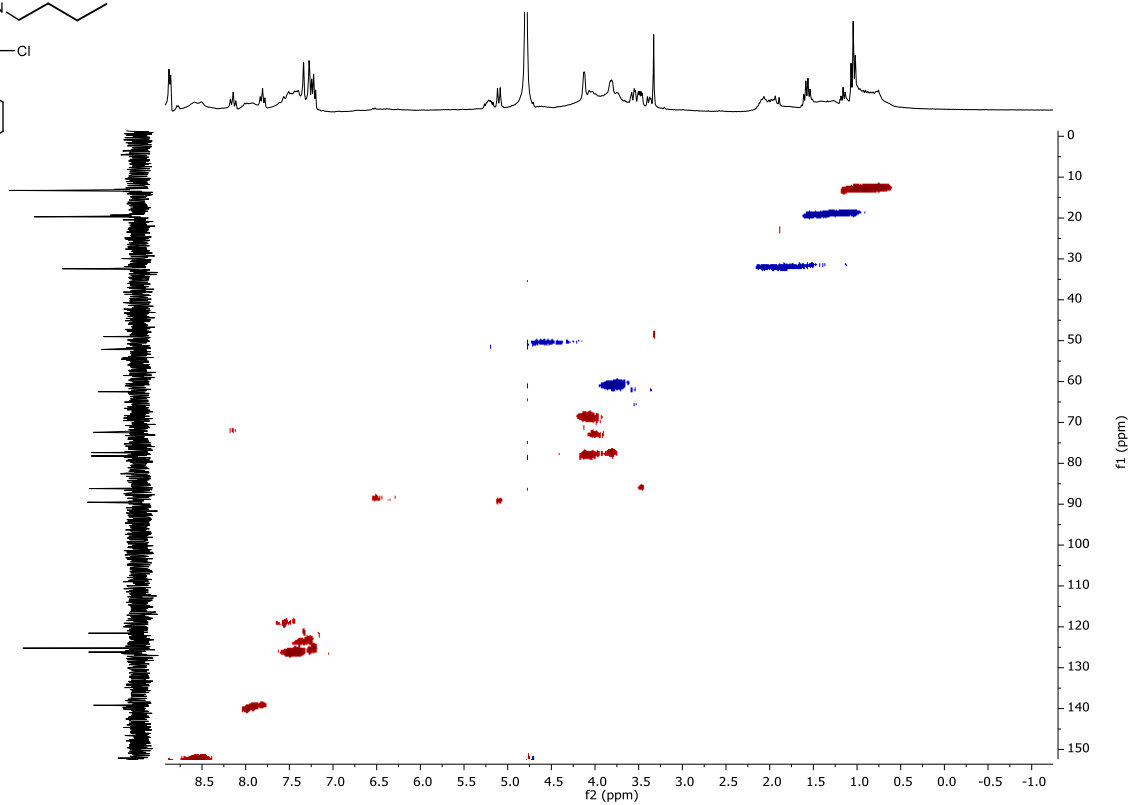

***o*-methoxybiphenyl** ( $^1\text{H}$  NMR,  $\text{CDCl}_3$ )

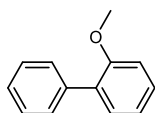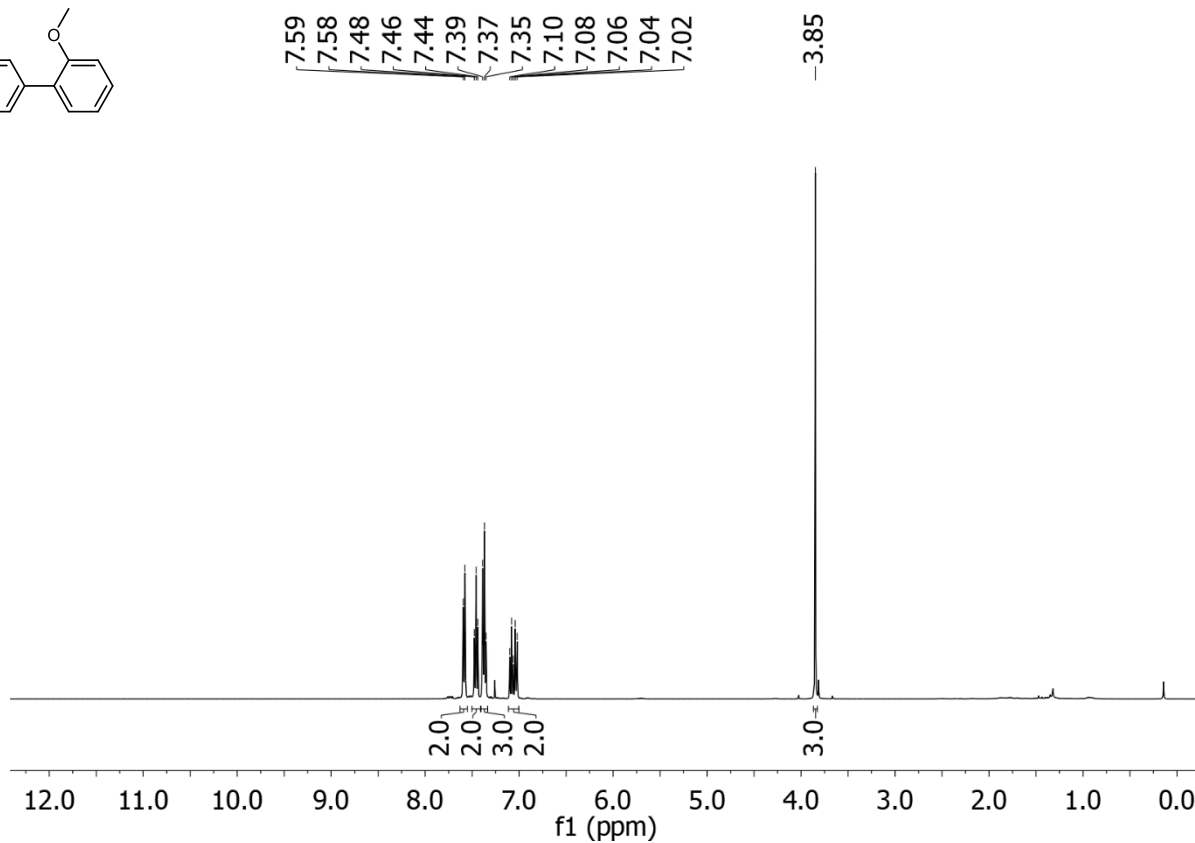

***o*-methoxybiphenyl** ( $^{13}\text{C}$  NMR,  $\text{CDCl}_3$ )

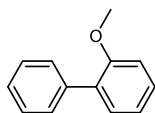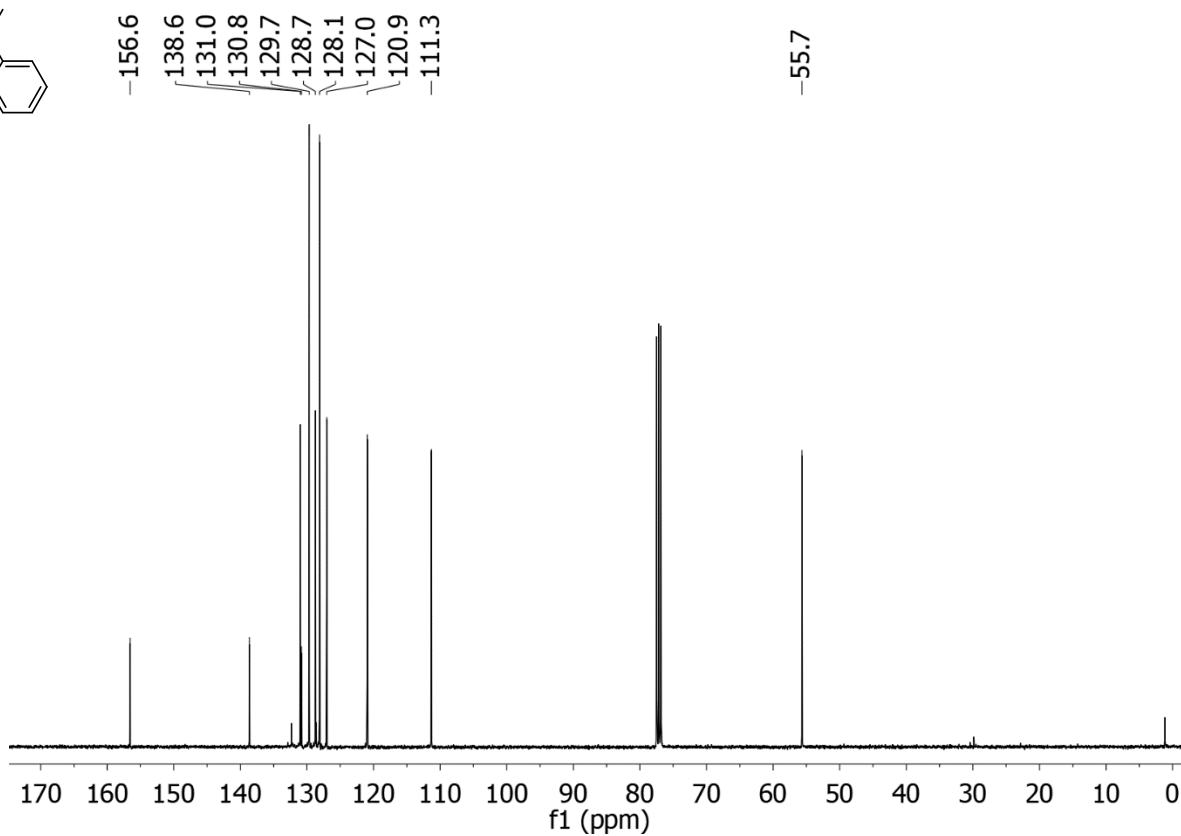

***m*-methoxybiphenyl (<sup>1</sup>H NMR, CDCl<sub>3</sub>)**

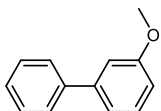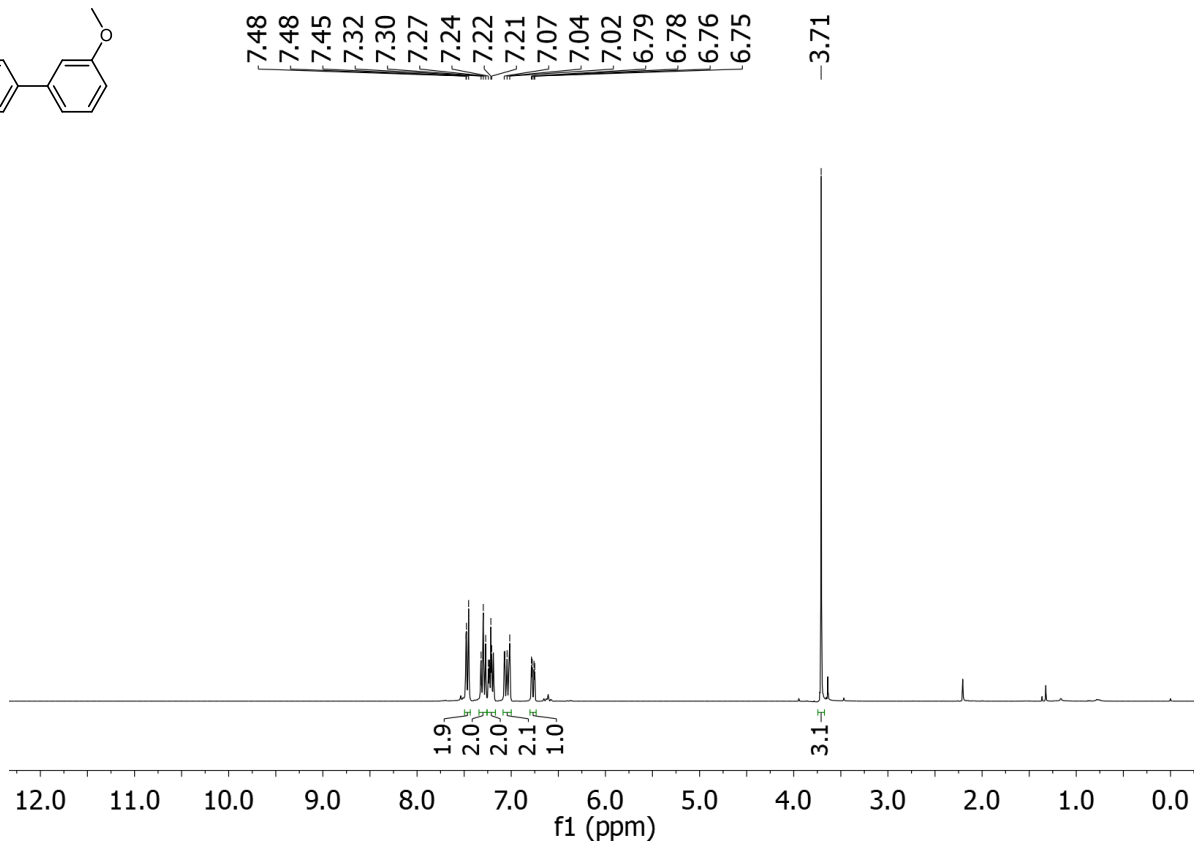

***m*-methoxybiphenyl (<sup>13</sup>C NMR, CDCl<sub>3</sub>)**

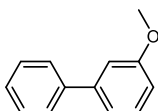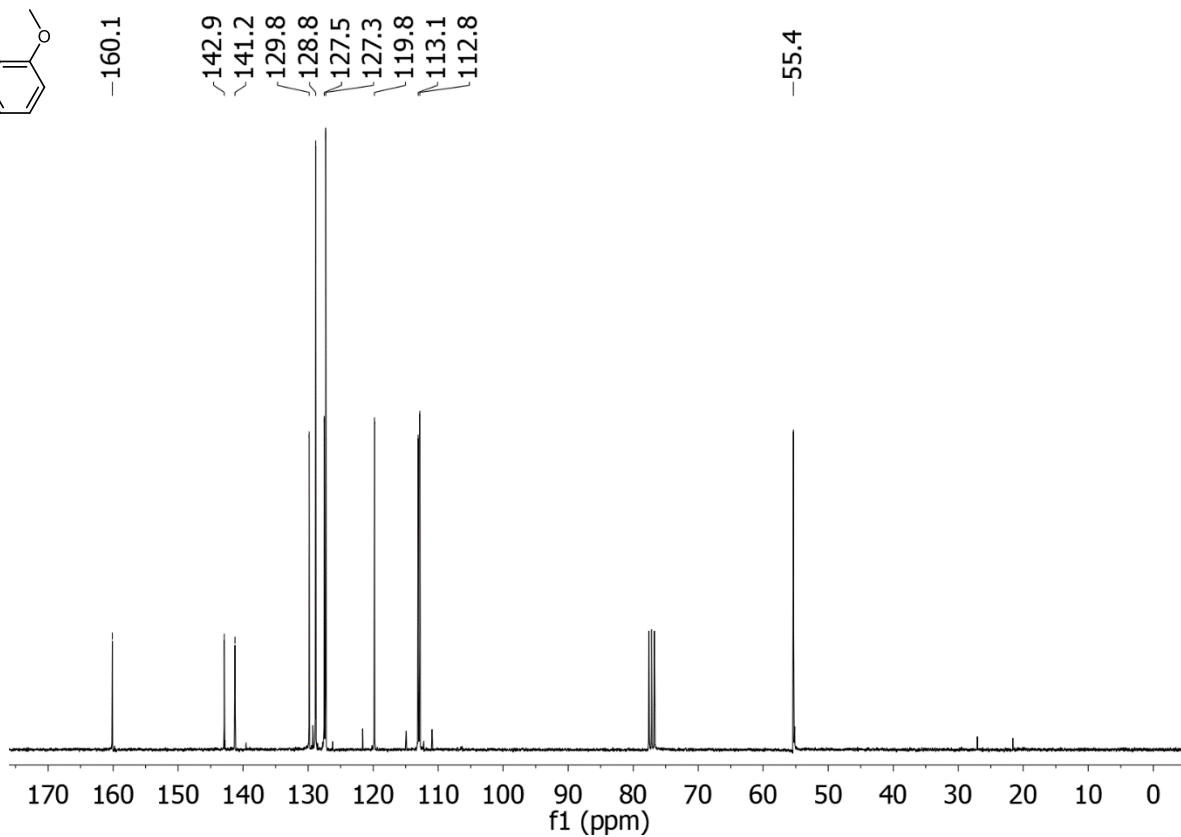

***p*-methoxybiphenyl (<sup>1</sup>H NMR, CDCl<sub>3</sub>)**

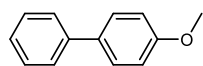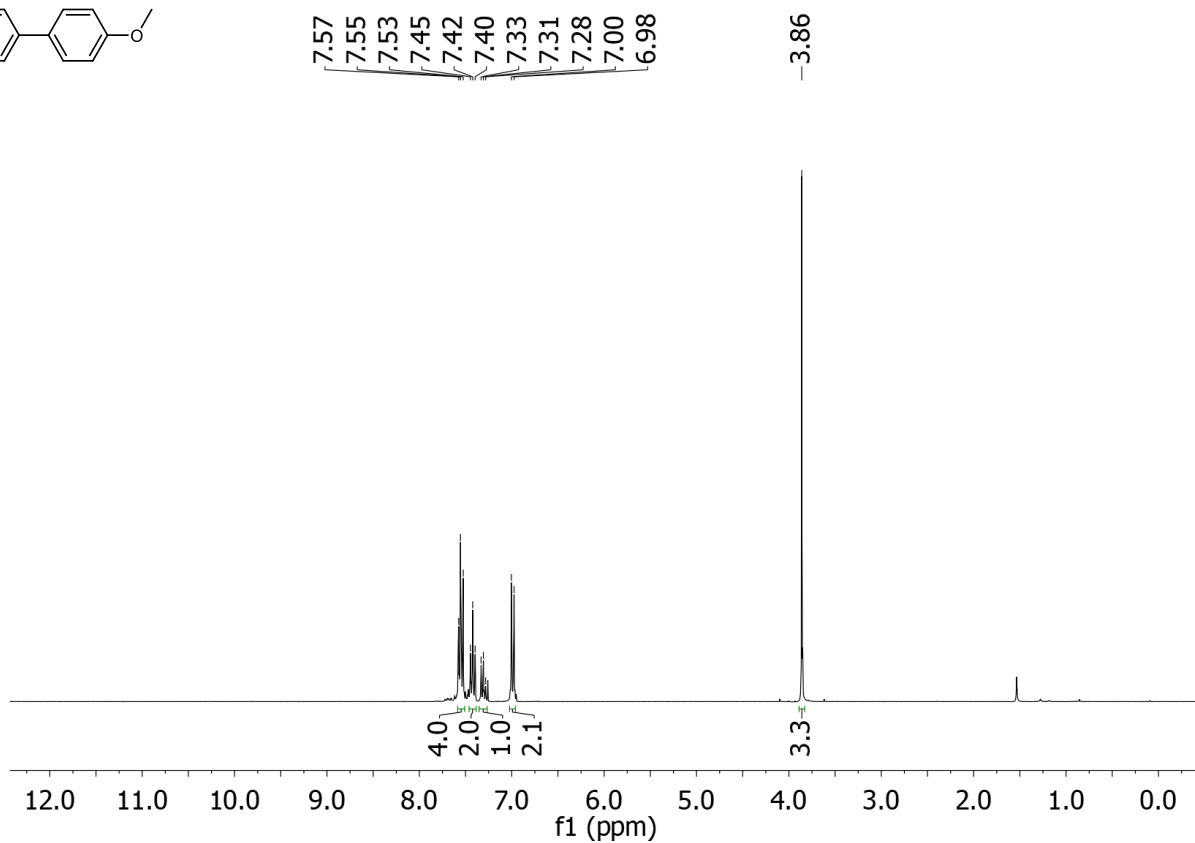

***p*-methoxybiphenyl (<sup>13</sup>C NMR, CDCl<sub>3</sub>)**

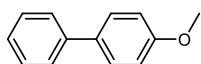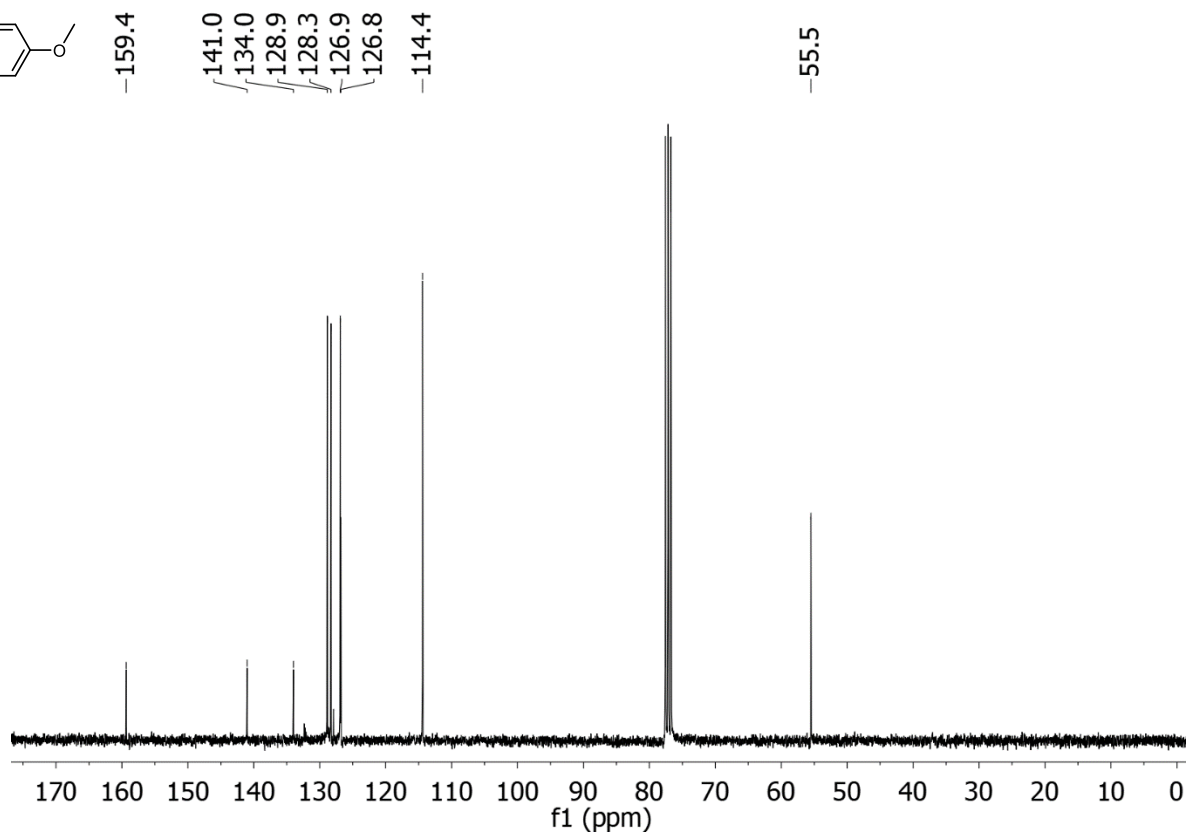

***m*-methylbiphenyl (<sup>1</sup>H NMR, CDCl<sub>3</sub>)**

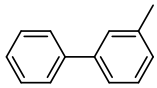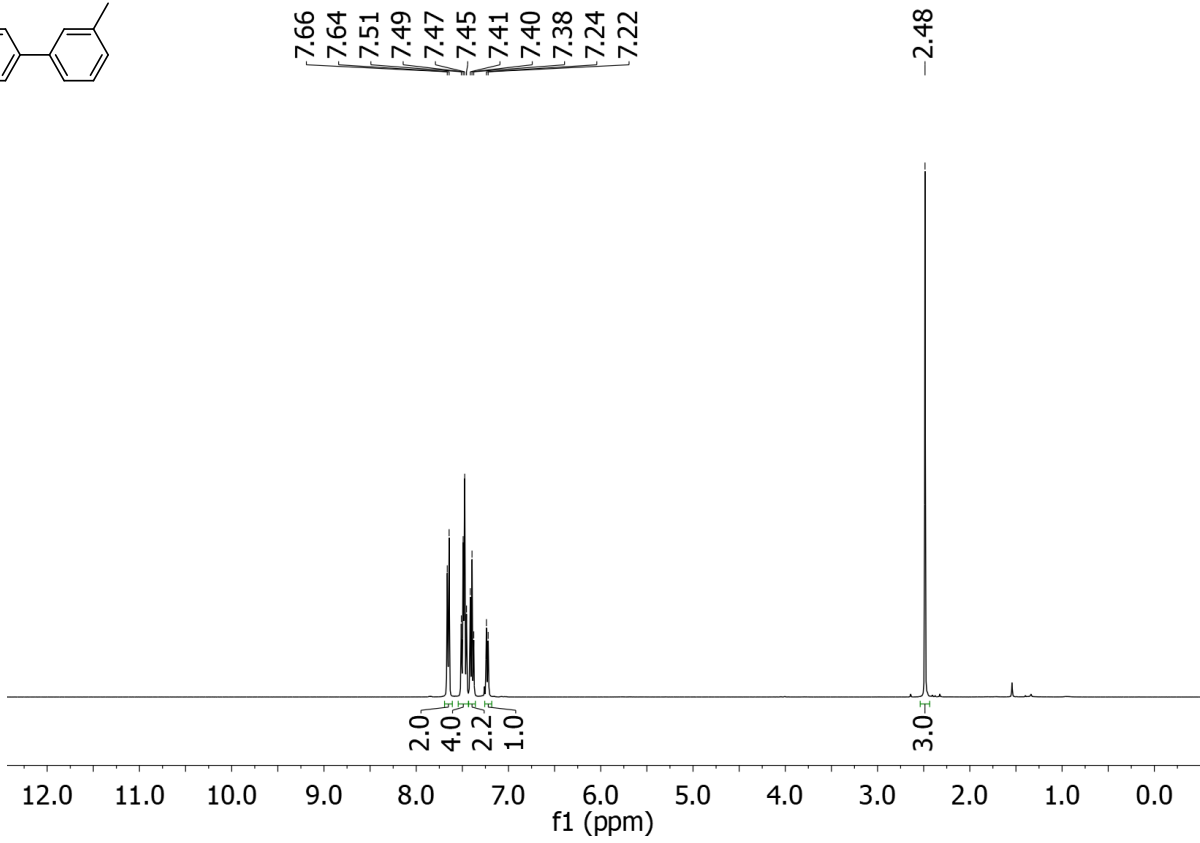

***m*-methylbiphenyl (<sup>13</sup>C NMR, CDCl<sub>3</sub>)**

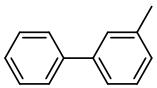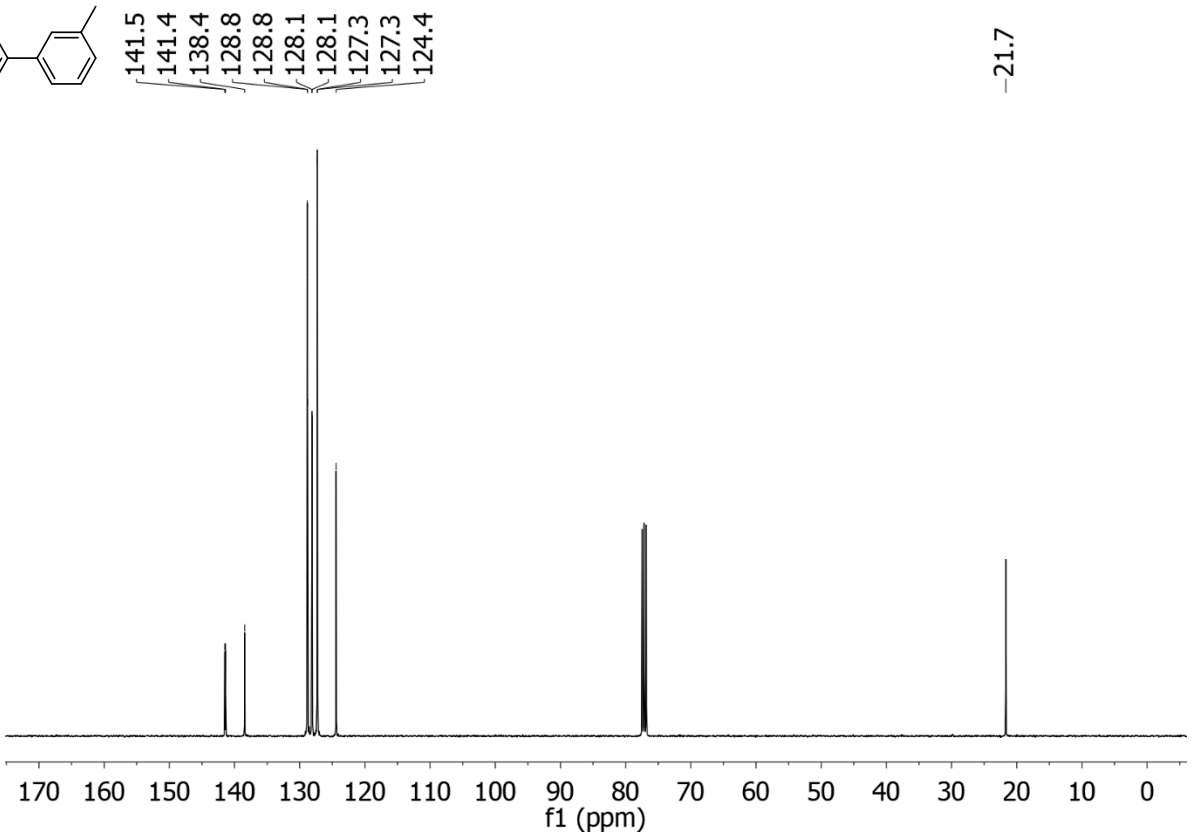

***p*-methylbiphenyl** ( $^1\text{H}$  NMR,  $\text{CDCl}_3$ )

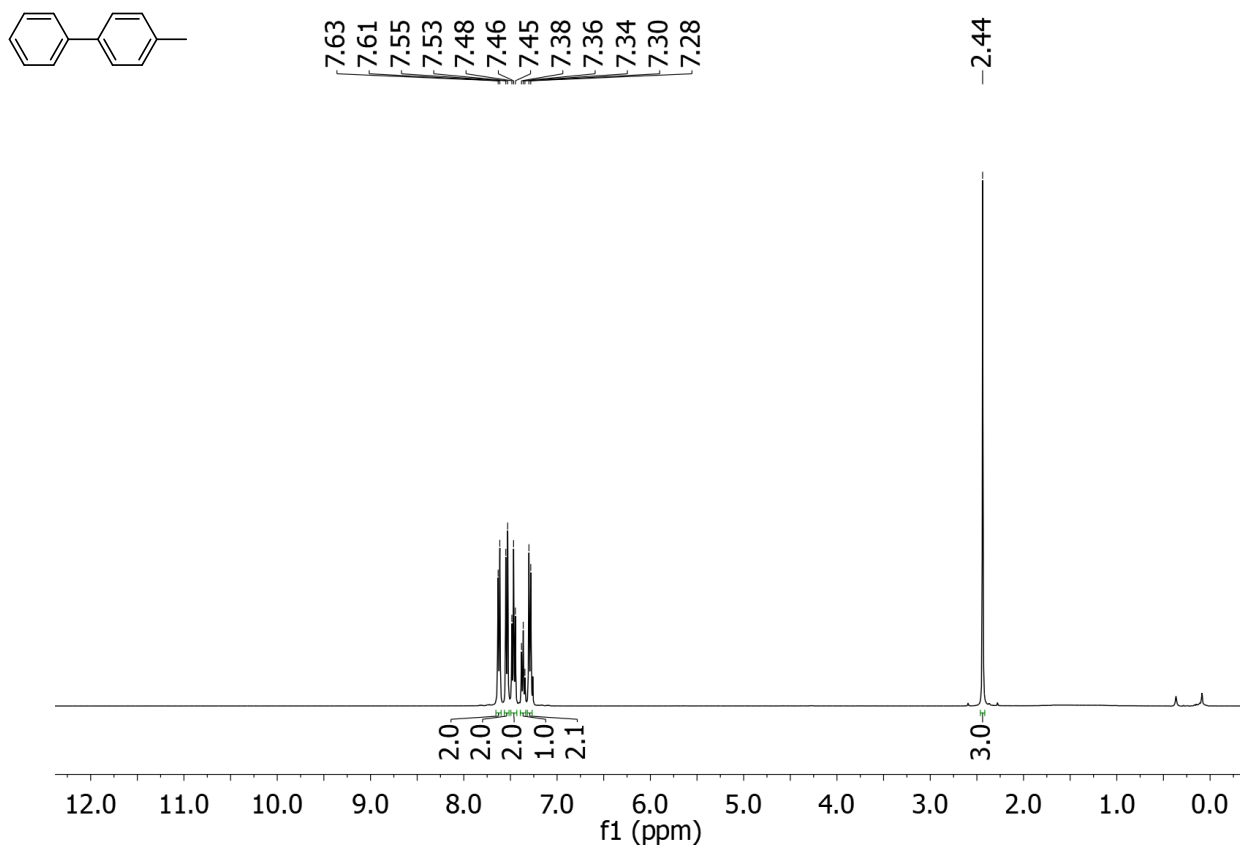

***p*-methylbiphenyl** ( $^{13}\text{C}$  NMR,  $\text{CDCl}_3$ )

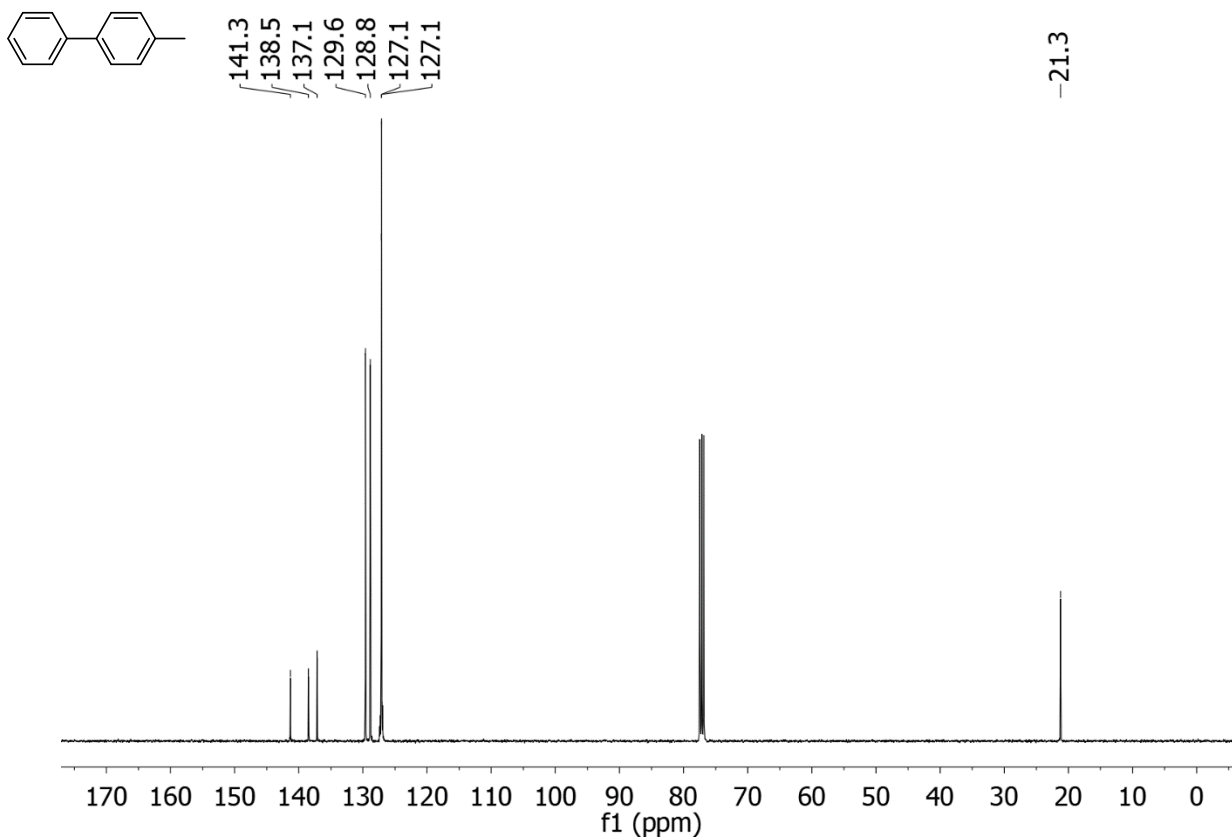

***m*-chlorobiphenyl (<sup>1</sup>H NMR, CDCl<sub>3</sub>)**

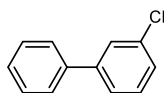

7.48  
7.44  
7.36  
7.31  
7.31  
7.29  
7.24  
7.22

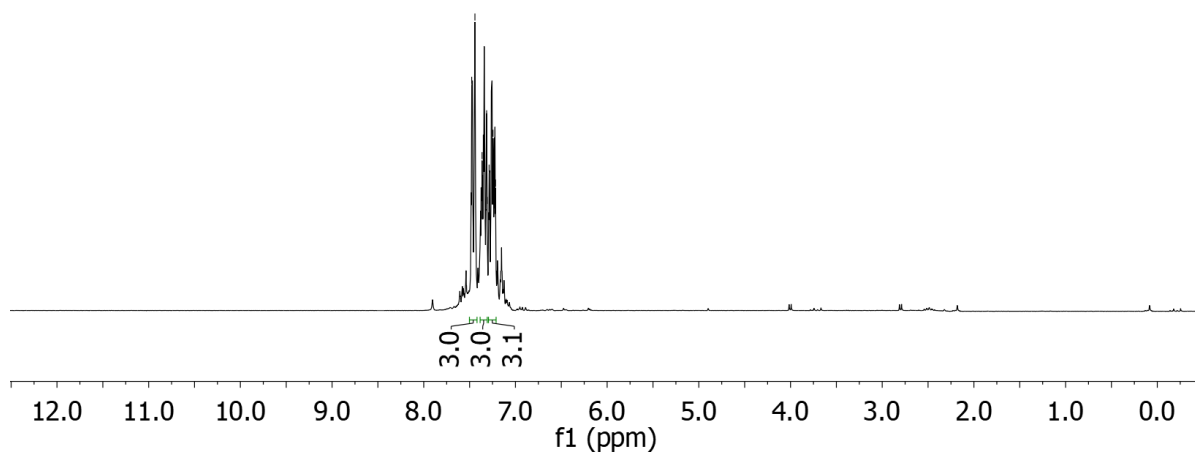

***m*-chlorobiphenyl (<sup>13</sup>C NMR, CDCl<sub>3</sub>)**

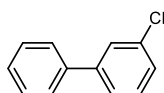

143.2  
139.9  
134.8  
130.1  
129.0  
128.0  
127.4  
127.3  
127.2  
125.4

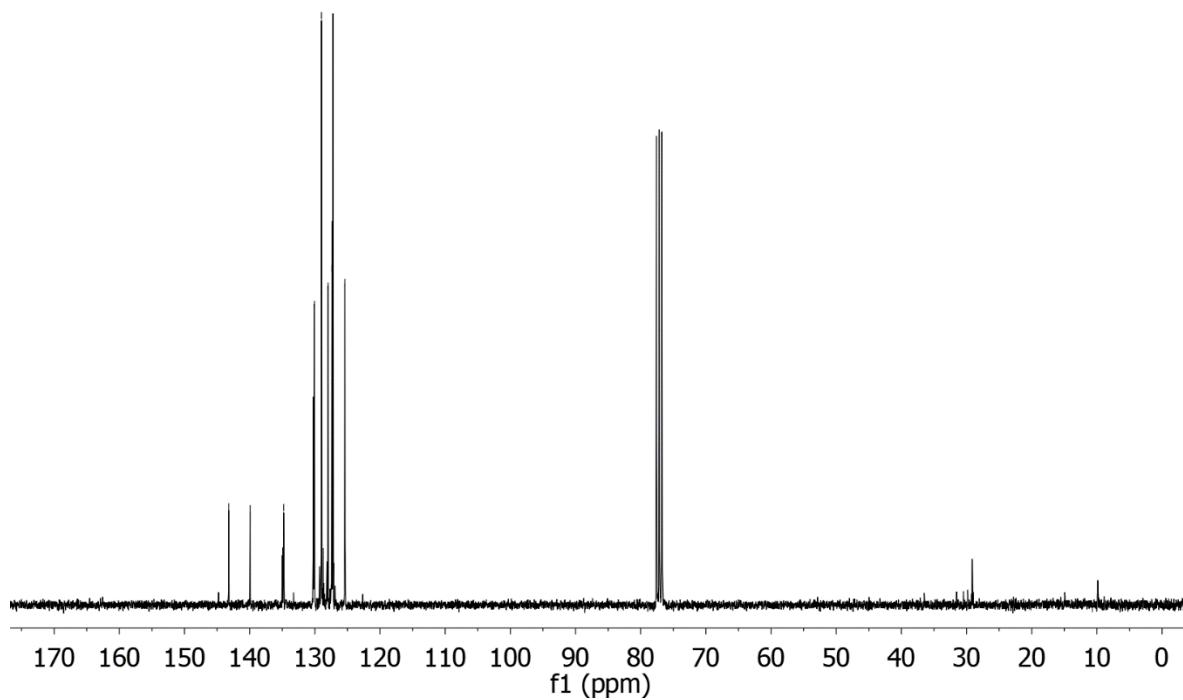

***p*-cyanobiphenyl** ( $^1\text{H}$  NMR,  $\text{CDCl}_3$ )

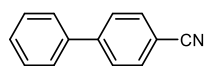

7.74  
7.72  
7.71  
7.68  
7.61  
7.58  
7.53  
7.49  
7.47  
7.45  
7.43  
7.41

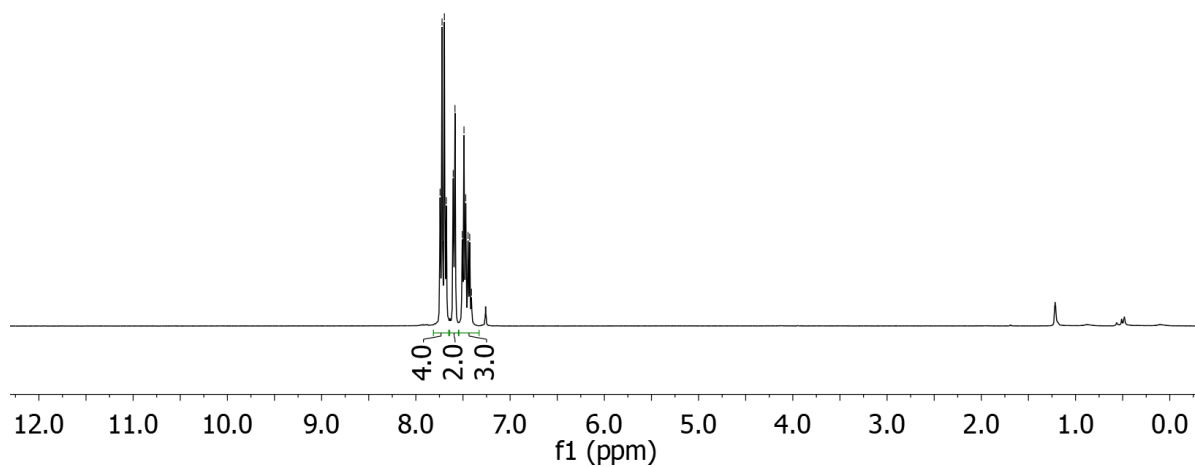

***p*-cyanobiphenyl** ( $^{13}\text{C}$  NMR,  $\text{CDCl}_3$ )

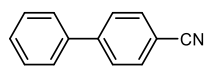

145.9  
139.3  
132.7  
129.2  
128.8  
127.9  
127.4  
119.2  
111.0

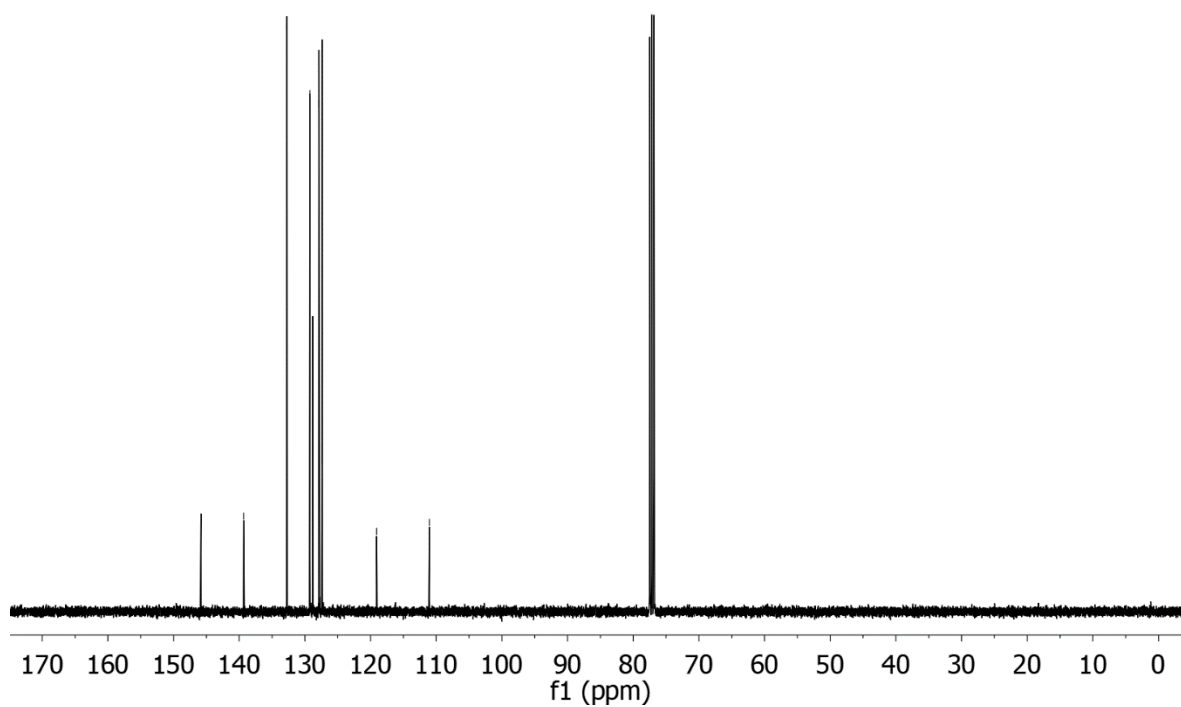

Supplement: d3ra08031e1.pdf [file d3ra08031e1.pdf]
